# Supplementary material
Source: MDPI journal article supplement (https://www.mdpi.com/2504-4990/5/4/66)
Supplement: s1 [file s1 › make-2518005-supplementary.pdf]

# PCa-Clf: A Classifier of Prostate Cancer Patients into Patients with Indolent and Aggressive Tumors Using Machine Learning

**Yashwanth Karthik Kumar Mamidi<sup>1</sup>, Tarun Karthik Kumar Mamidi<sup>2</sup>, Md Wasi Ul Kabir<sup>1</sup>, Jiande Wu<sup>3</sup>, Md Tamjidul Hoque<sup>1,\*</sup>, Chindo Hicks<sup>3,\*</sup>**

<sup>1</sup> Department of Computer Science, University of New Orleans, New Orleans, LA 70148, USA; mamidiyashwanth20@gmail.com (Y.K.K.M.); mkabir3@uno.edu (M.W.U.K.); thoque@uno.edu (M.T.H.)

<sup>2</sup> Department of Genetics, Heersink School of Medicine, The University of Alabama at Birmingham, 720 20th Street S, Birmingham, AL, 35294, USA; [tmamidi@uab.edu](mailto:tmamidi@uab.edu) (T.K.K.M.)

<sup>3</sup> Center for Computational Genomics and Data Science, The University of Alabama at Birmingham, 912 18th St S, Birmingham, AL, 35233, USA; [tmamidi@uab.edu](mailto:tmamidi@uab.edu) (T.K.K.M.)

<sup>3</sup> Department of Genetics and the Bioinformatics and Genomics Program, Louisiana State University Health Sciences Center, School of Medicine, 533 Bolivar Street, New Orleans, LA 70112, USA; [jiandewu@lsuhsc.edu](mailto:jiandewu@lsuhsc.edu) (J.W.); [chick3@lsuhsc.edu](mailto:chick3@lsuhsc.edu) (C.H.)

\* Correspondence: [thoque@uno.edu](mailto:thoque@uno.edu) (M.T.H.); [chick3@lsuhsc.edu](mailto:chick3@lsuhsc.edu) (C.H.)

(Supplementary Material)

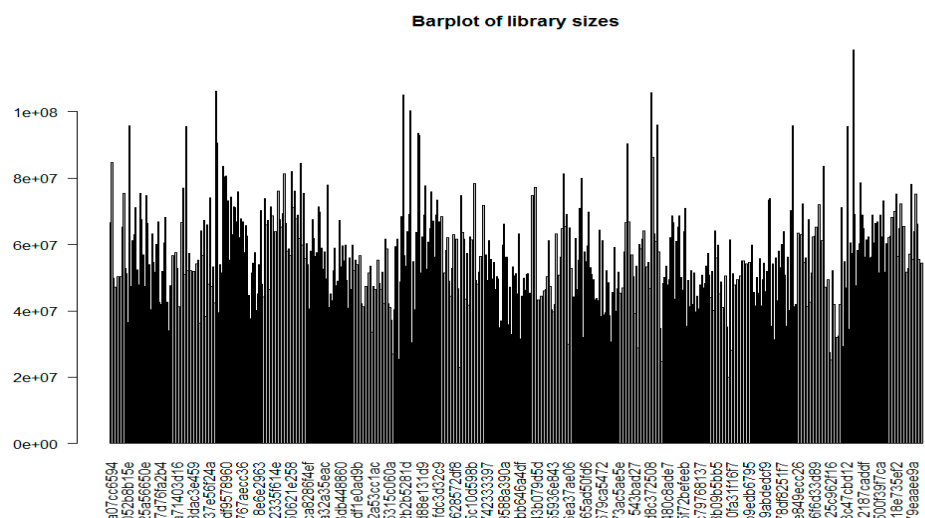

**Supplementary Figure S1.** Library sizes of all samples expressed using a bar plot constitute data quality and unnormalized library sizes.

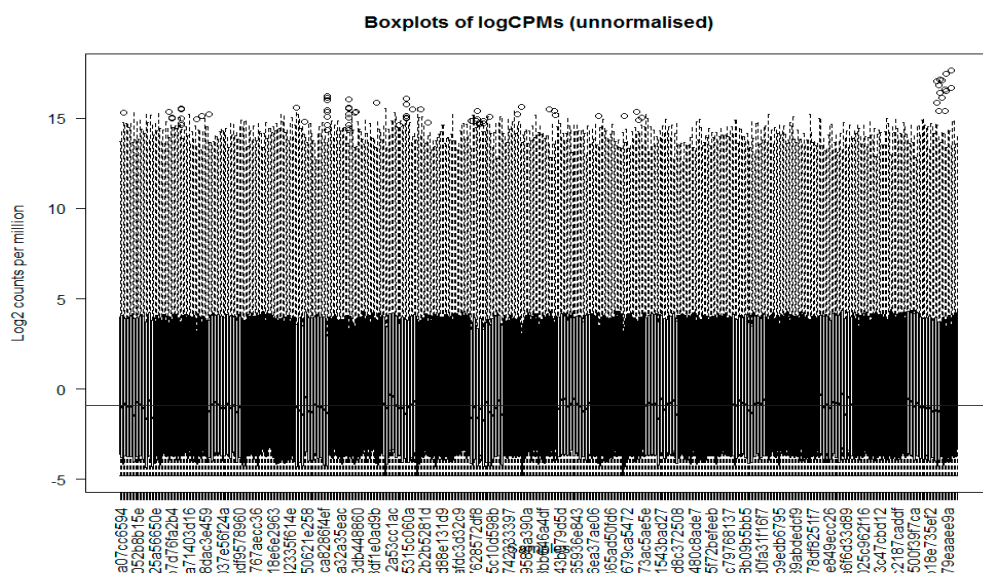

**Supplementary Figure S2.** Figure checks the read counts' distribution on the log2 scale of logCPM (log counts per million) before normalization.

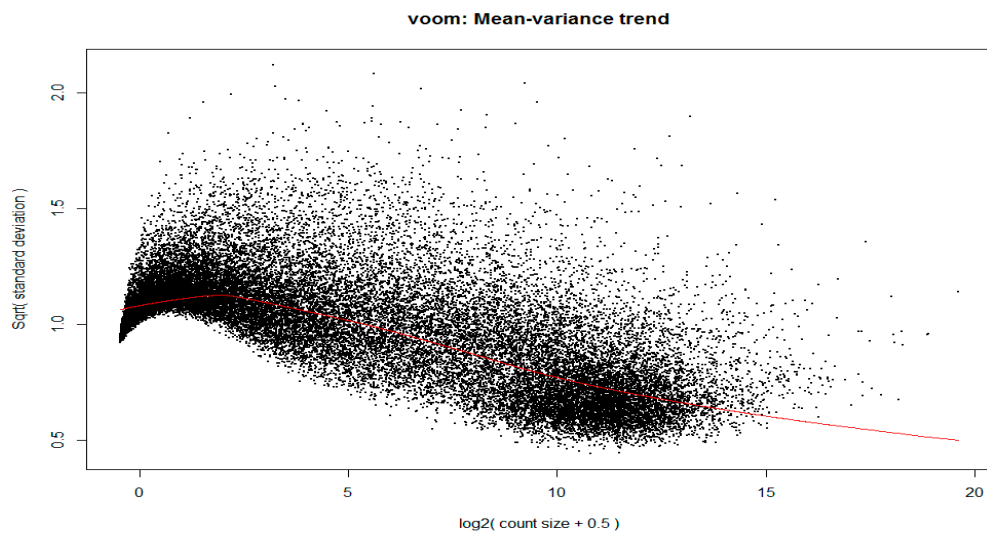

**Supplementary Figure S3.** Figure showing the Voom transformation using a decision matrix and mean–variance trend.

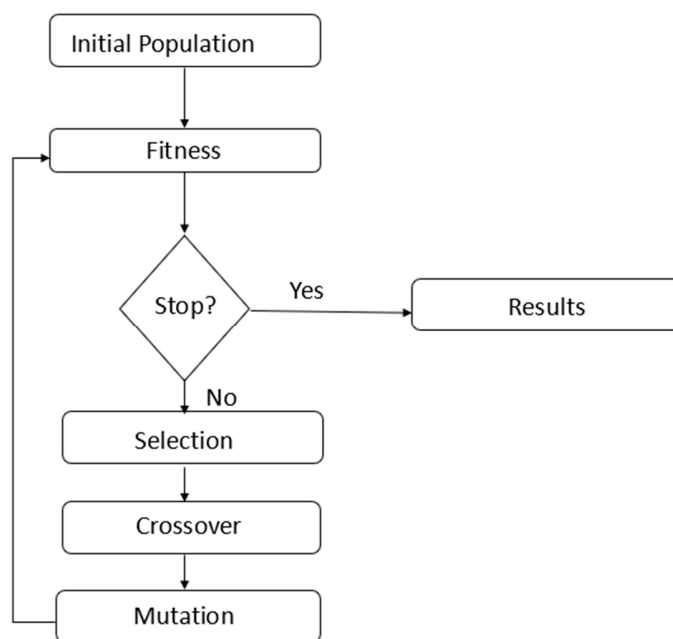

**Supplementary Figure S4.** The flowchart represents the implementation of the Genetic Algorithm.

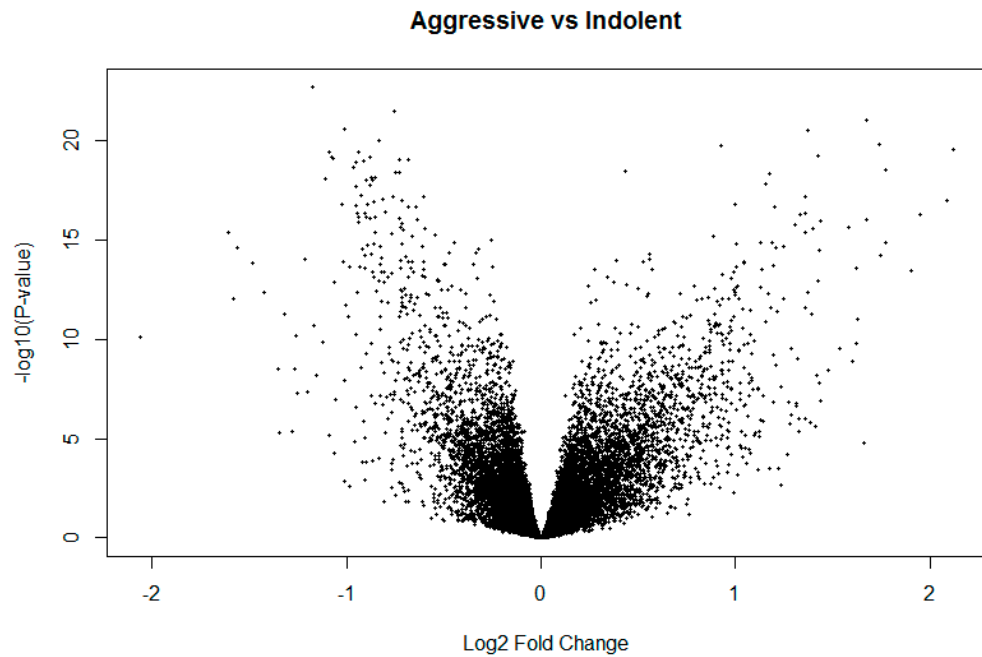

**Supplementary Figure S5.** Volcano plot from Differential Expression Analysis using Limma package on indolent- vs. aggressive-PCa samples (Model 1).

- This initial level 1 analysis for Model 2 yielded 15,105 significantly ( $p < 0.05$ ) and 20,712 significantly ( $p < 0.05$ ) differentially expressed probes associated with indolent and aggressive PCas, respectively. We used a volcano plot (Figure 6) to discover a signature of genes significantly ( $p < 0.05$ ) associated with each disease state.

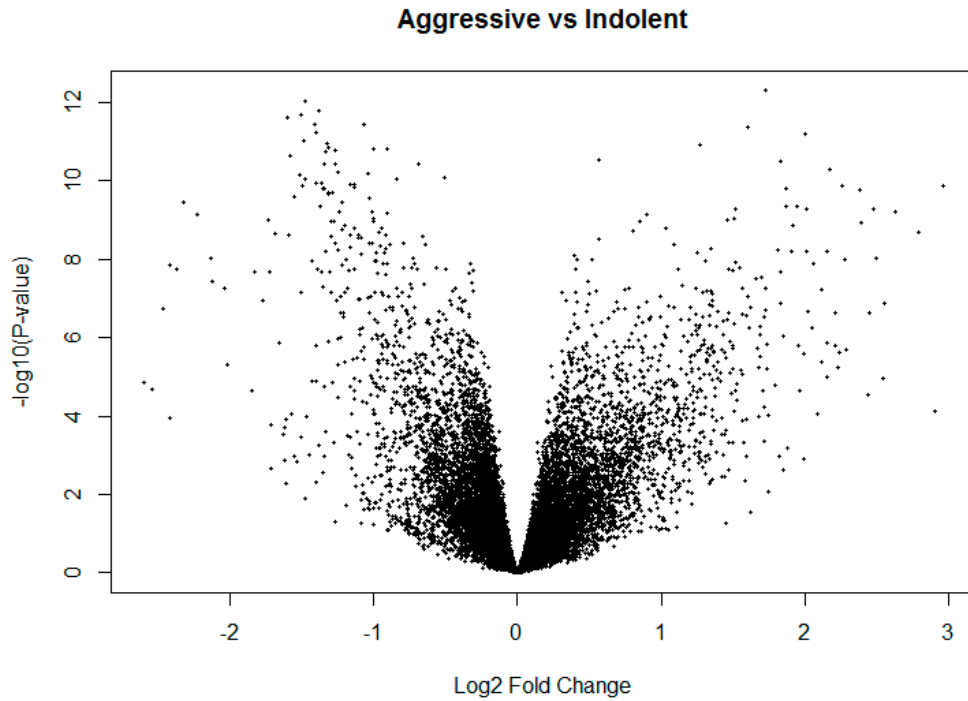

**Supplementary Figure S6.** Volcano plot from Differential Expression Analysis using Limma package on indolent- vs. aggressive-PCa samples (Model 2).

- The initial level-1 analysis for Model 3 yielded 5220 significantly ( $p < 0.05$ ) and 3352 significantly ( $p < 0.05$ ) differentially expressed probes associated with Indolent and Aggressive, respectively. We then compared indolent- and aggressive-PCa samples using the differentially expressed probes from the earlier analysis and used a volcano plot (Figure 7) to discover a signature of genes significantly ( $p < 0.05$ ) associated with each disease state.

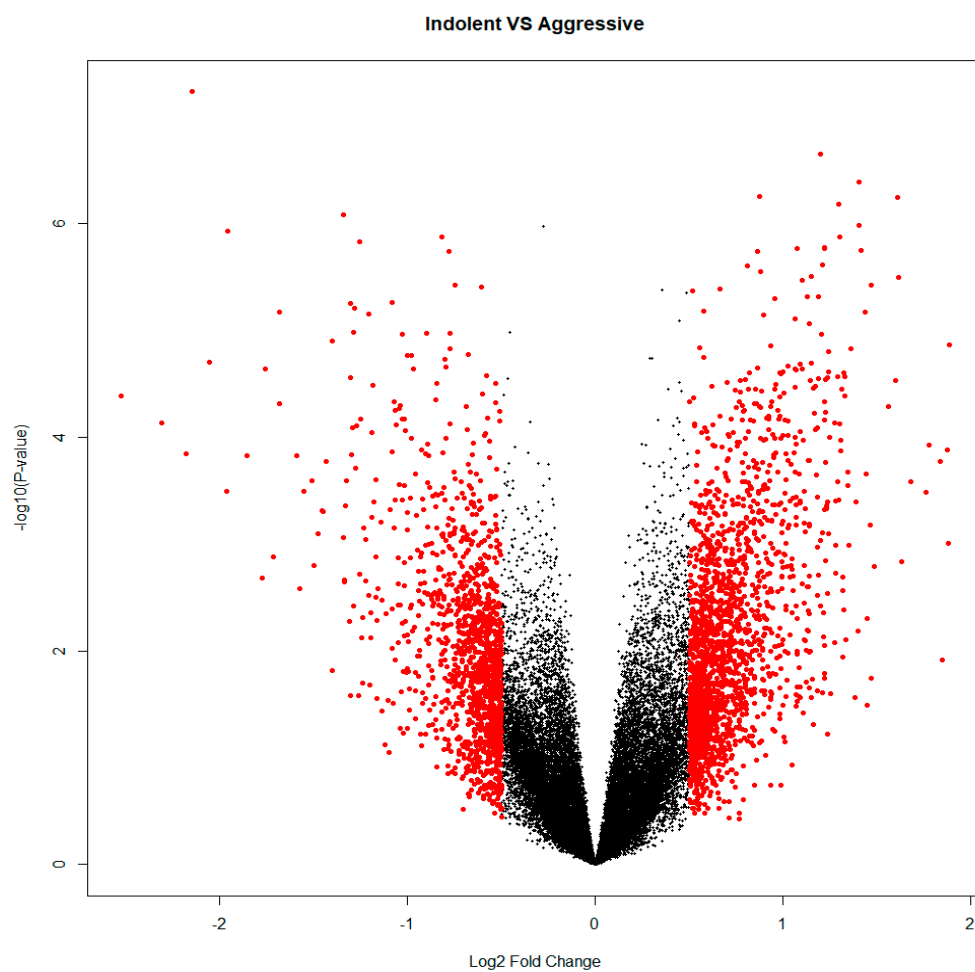

**Supplementary Figure S7.** Volcano plot from Differential Expression Analysis using Limma package on indolent- vs. aggressive-PCa samples (Model 3).
